# Supplementary material
Source: Springer Nature journal article supplement (https://www.springermedizin.de/resource/supplementary/13102_2010_56_MOESM2_ESM.pdf/9667636)

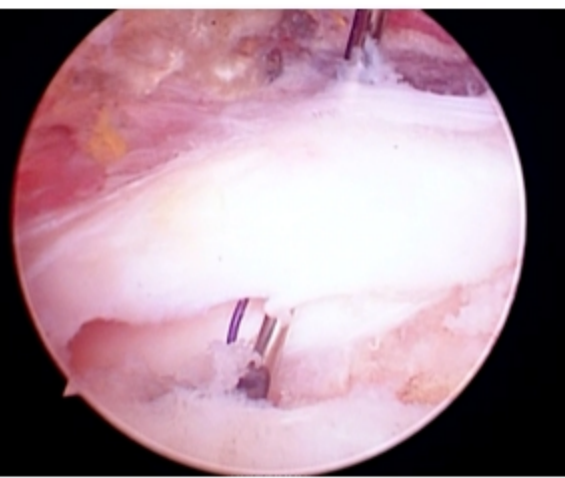

**A**

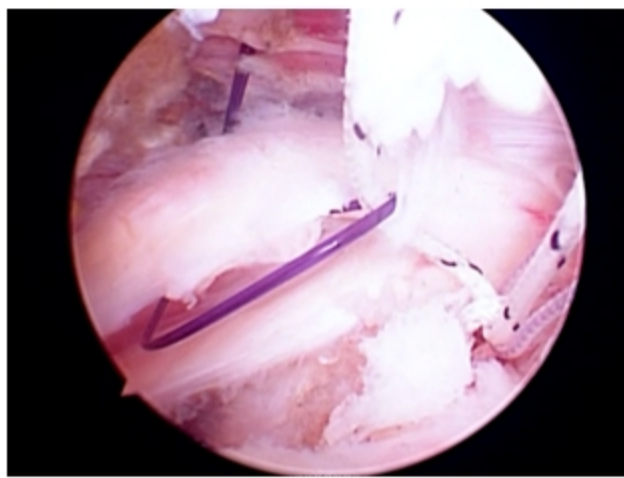

**B**

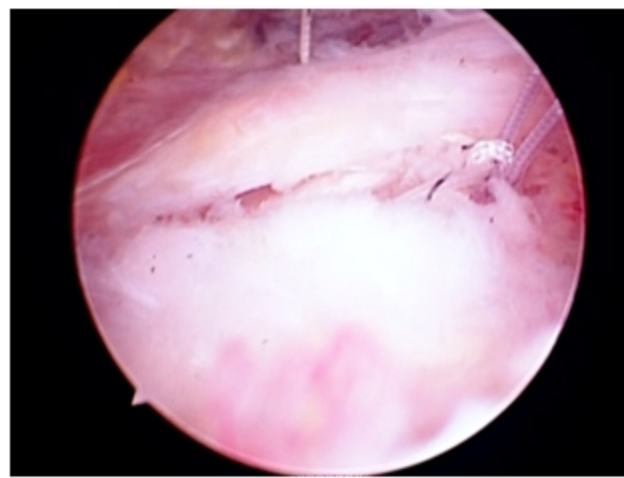

**C**

Supplement: MOESM2 [file 9667636]
